# Supplementary material
Source: PubMed Central journal article supplement (PMC3637856)
Supplement: NIHMS442020-supplement-supplement_1.pdf [file NIHMS442020-supplement-supplement_1.pdf]

## Supplementary information:

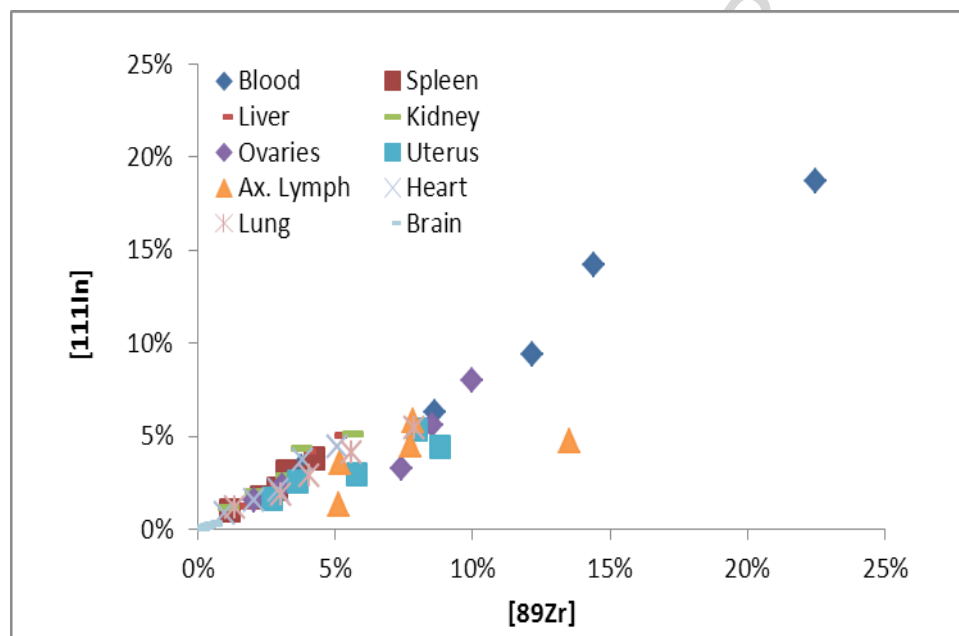

**Figure SI-01** Biodistribution %ID/g comparison in non-tumor bearing athymic nude mice (n = 2 female per time point) for radionuclide(s) <sup>111</sup>In- and <sup>89</sup>Zr- labeled panitumumab for the various time-points. Mice were i.v. injected 1.85 MBq and 5.3 MBq via tail-vein for <sup>89</sup>Zr-panitumumab and <sup>111</sup>In-panitumumab, respectively. The %ID/g uptake of panitumumab resulted in a good correlation  $R^2 > 0.93$   $p < 0.0009$  between <sup>111</sup>In- and <sup>89</sup>Zr- labeled panitumumab.

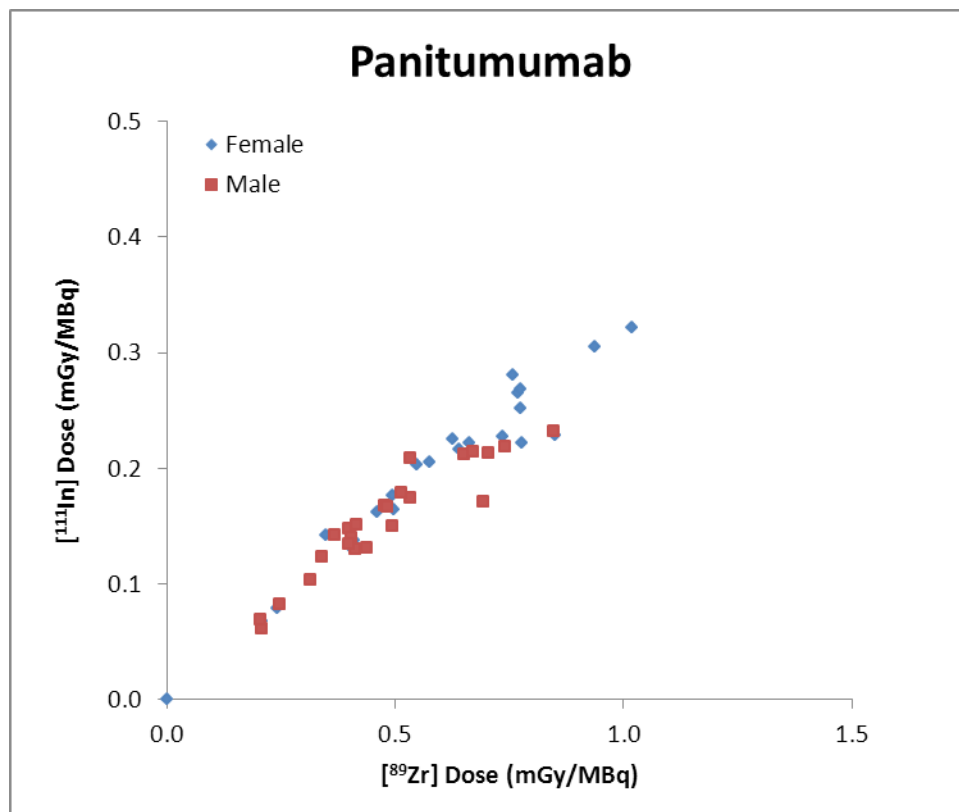

**Figure SI-02** Human organ dosimetry (mGy/MBq) comparison for radionuclide(s) <sup>111</sup>In- and <sup>89</sup>Zr-labeled panitumumab resulted in a good correlation  $R^2 > 0.94$   $p < 0.0001$  between <sup>111</sup>In and <sup>89</sup>Zr, and also illustrating the higher organ dose of <sup>89</sup>Zr- than <sup>111</sup>In-labeled panitumumab due to the higher energy and emission rate (S-values) of <sup>89</sup>Zr.
